# Supplementary material for: Degradation-as-signal: a digital-twin framework for disposable optical glucose sensing with lead-free perovskite-inspired films
Source: Royal Society of Chemistry journal article supplement (doi:10.1039/d6ra01076h), 2026-04-22

### Figure S1 - Sensitivity to optical exponent $\beta$

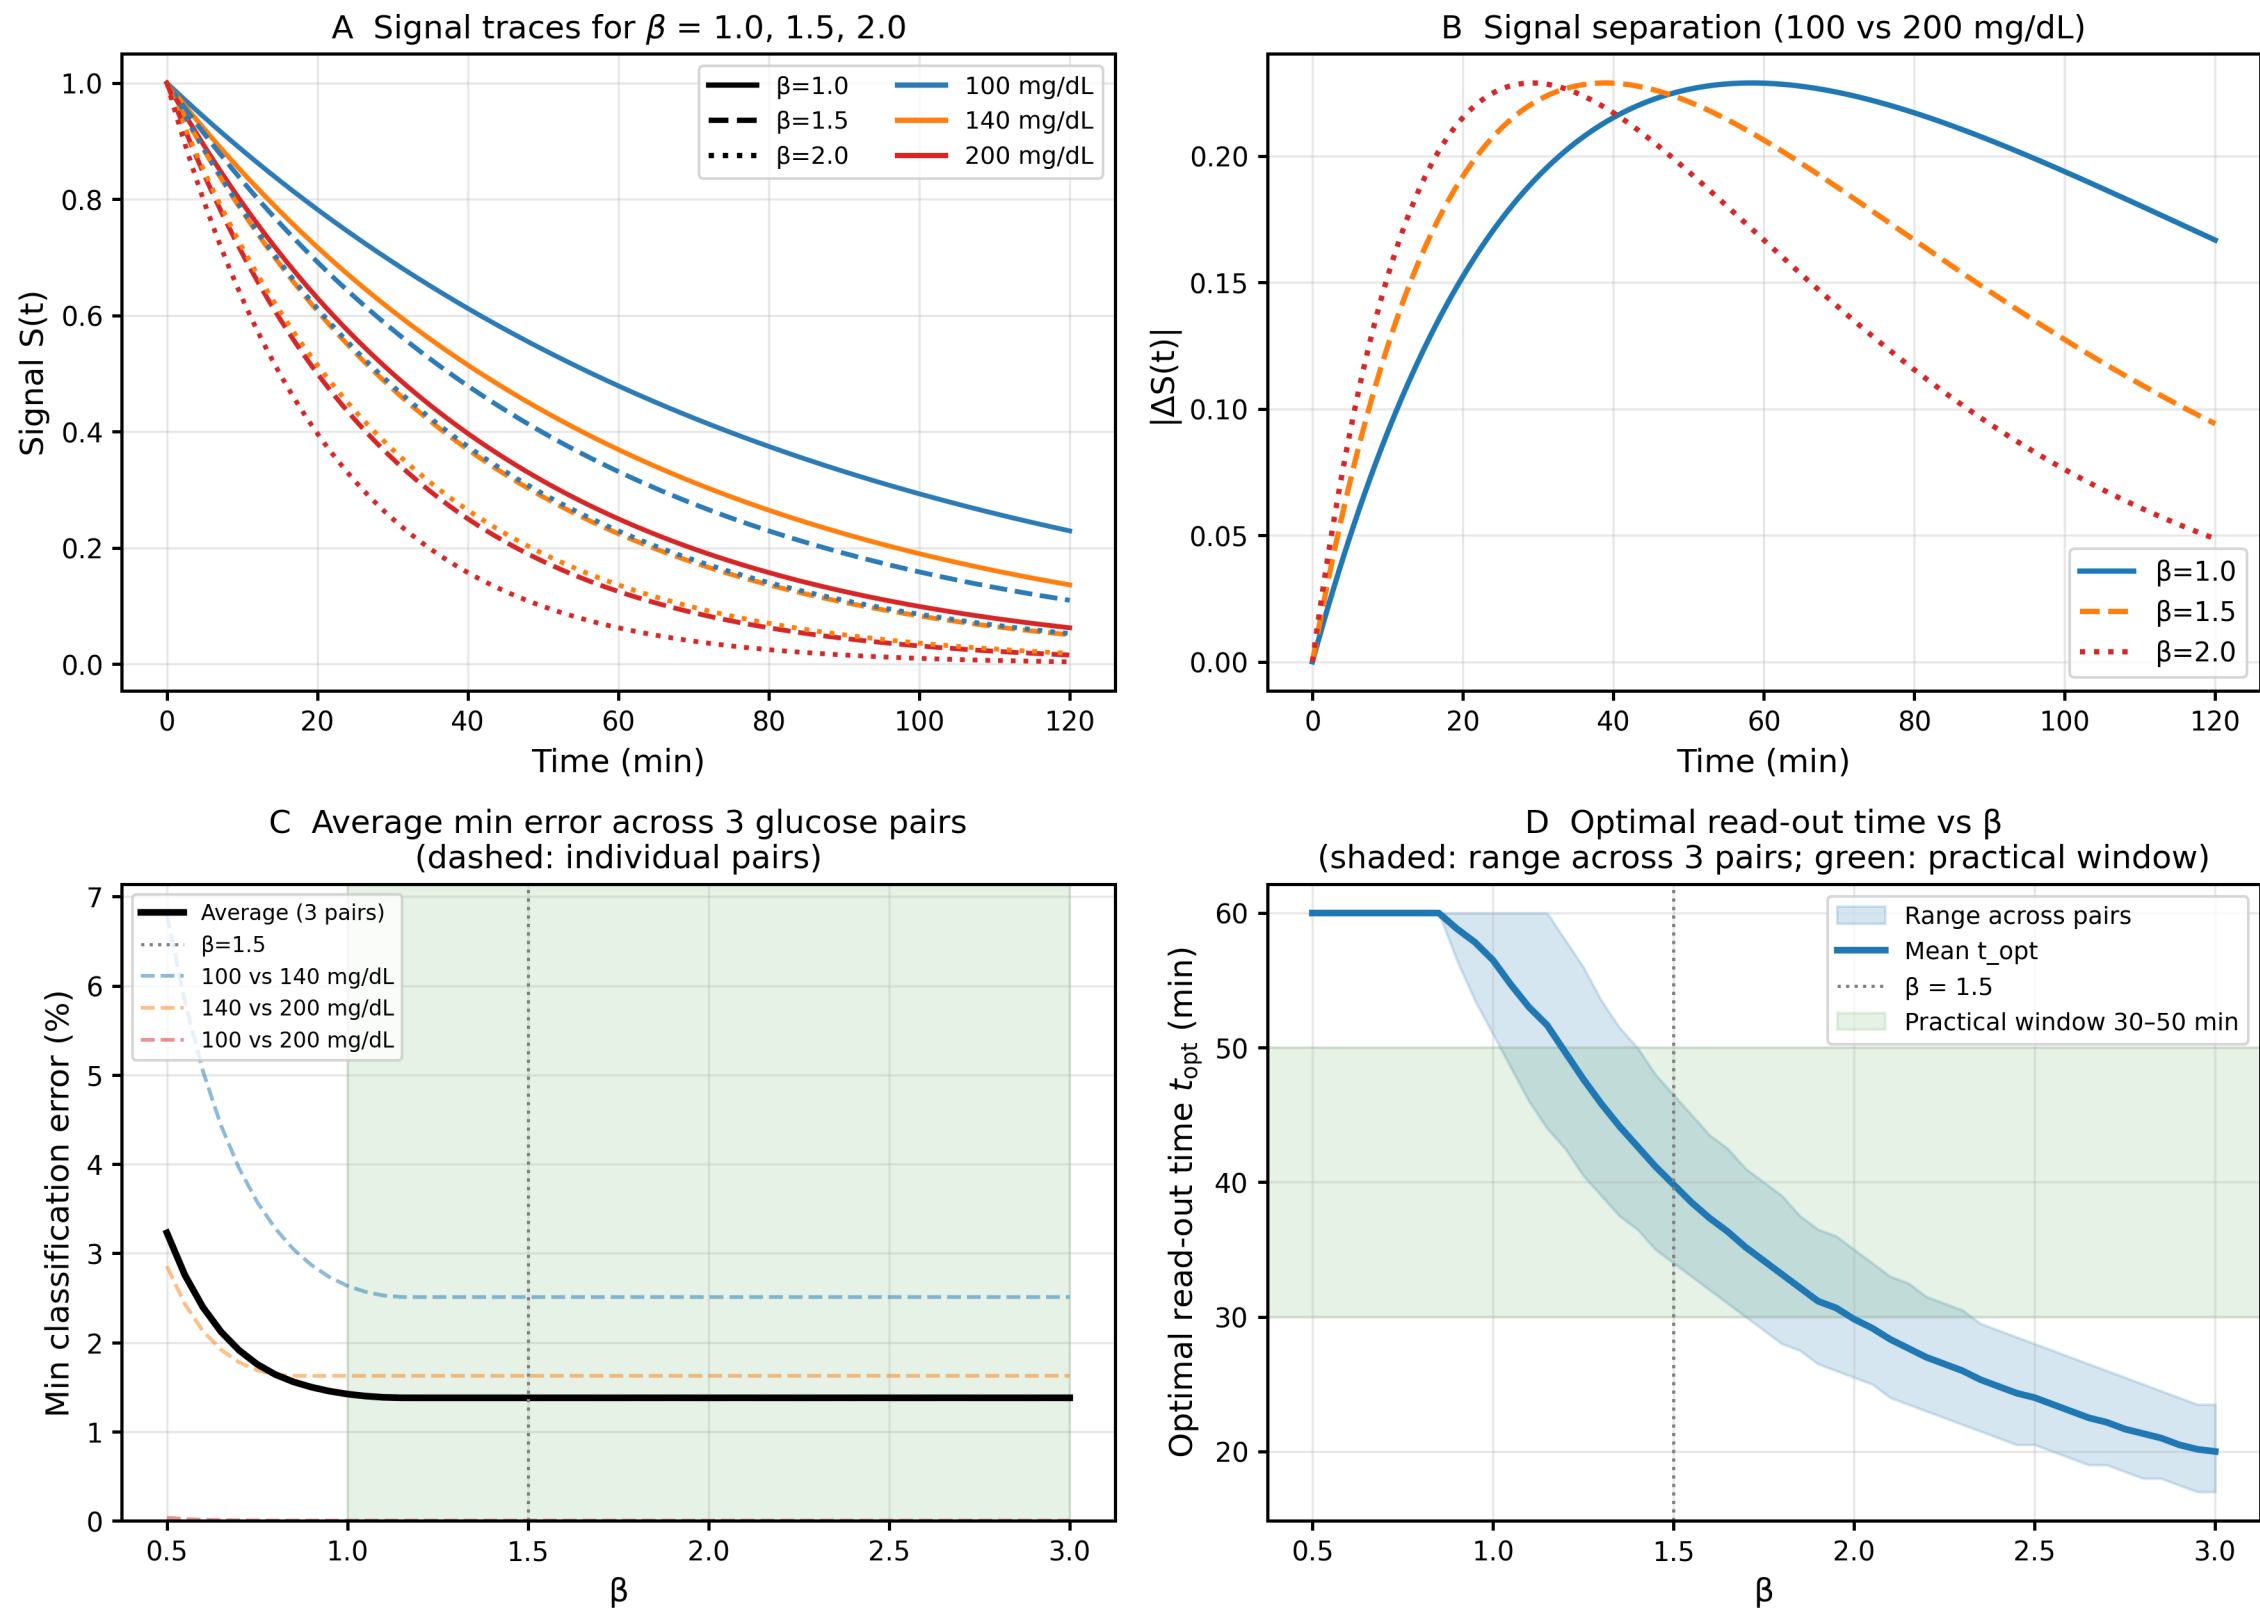

Supplement: d6ra01076h2.pdf [file d6ra01076h2.pdf]
