# Supplementary material for: Degradation-as-signal: a digital-twin framework for disposable optical glucose sensing with lead-free perovskite-inspired films
Source: Royal Society of Chemistry journal article supplement (doi:10.1039/d6ra01076h), 2026-04-22

**Figure S2 Transport-regime parameter sweep:  $D_{\text{eff}} \times k_{\text{cons}}$  (1D GOx model, unscaled)**

**A** Max degradation heterogeneity  
 $\max_t |C(0, t) - C(L, t)|$

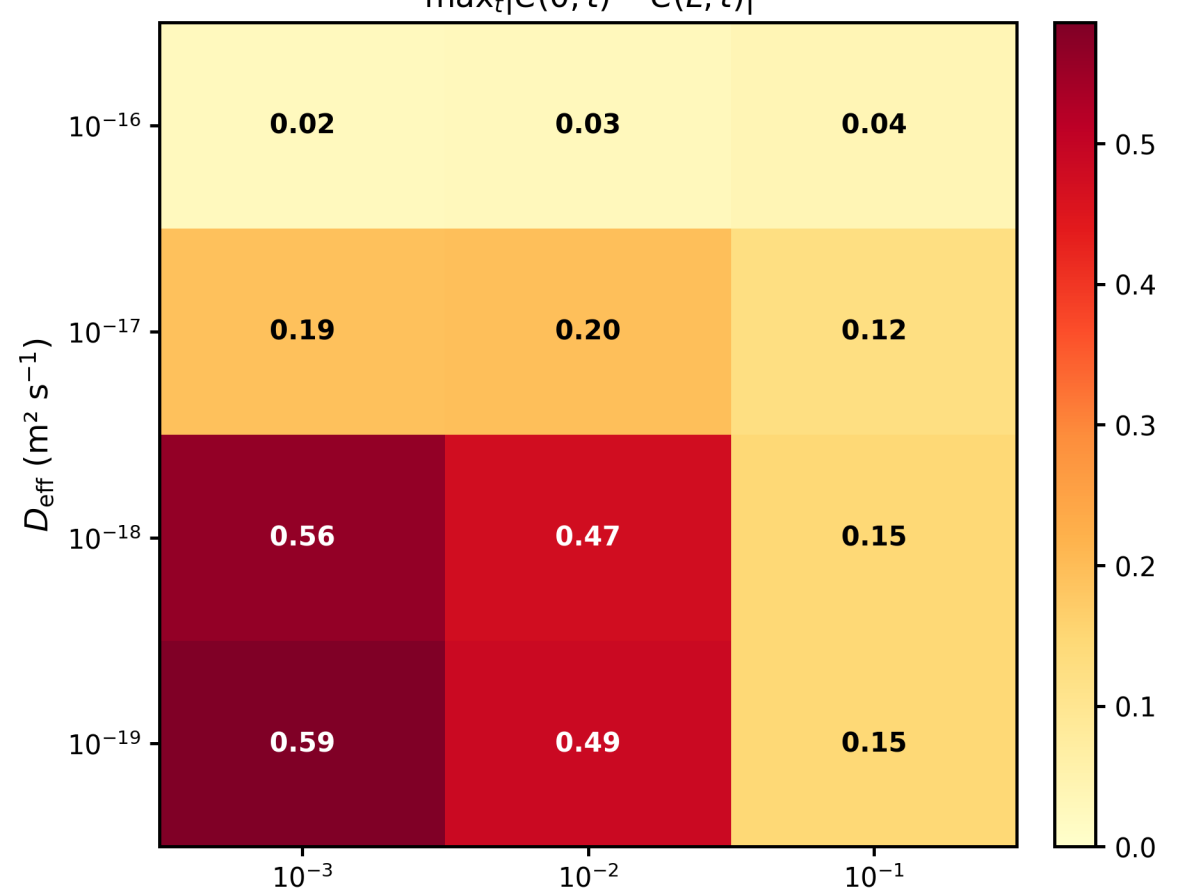

**B** Normalised  $\text{H}_2\text{O}_2$  depth gradient  
 $\max_t |H(0, t) - H(L, t)| / \max_t H(0, t)$

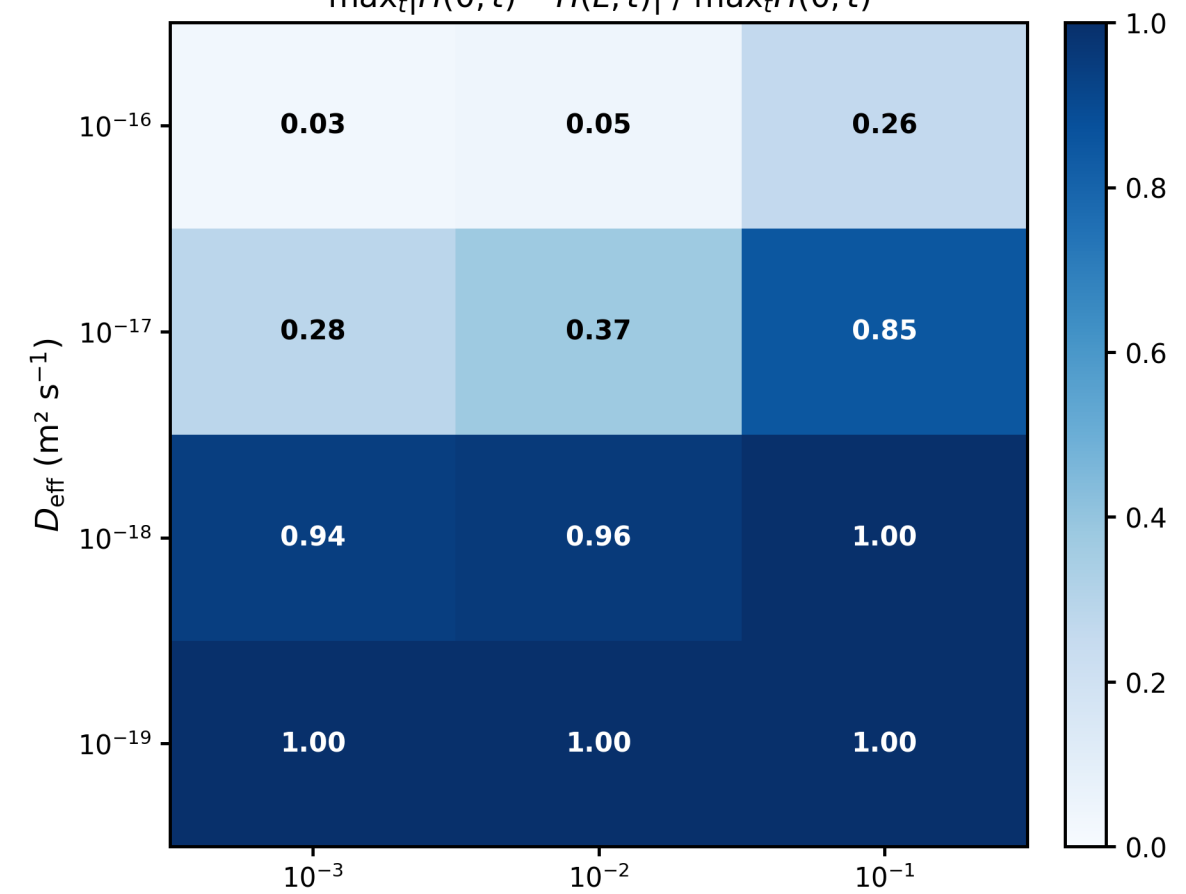

**C**  $D_{\text{eff}} = 10^{-19}$   $k_{\text{cons}} = 10^{-1} \text{min}^{-1}$

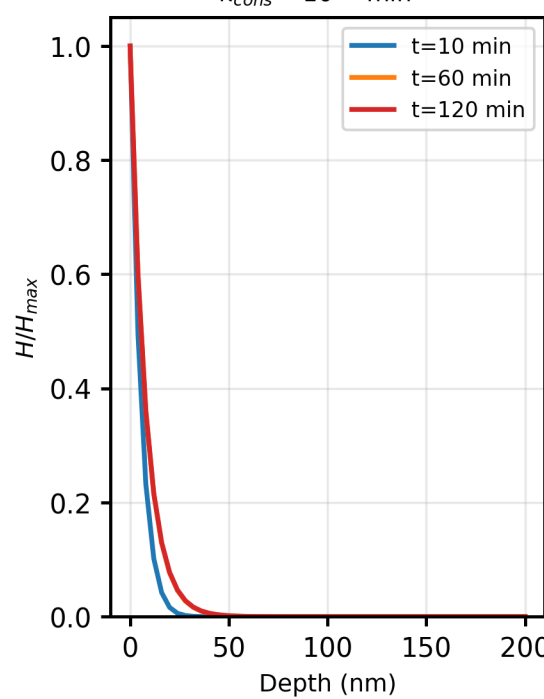

**D**  $D_{\text{eff}} = 10^{-19}$   $k_{\text{cons}} = 10^{-3} \text{min}^{-1}$

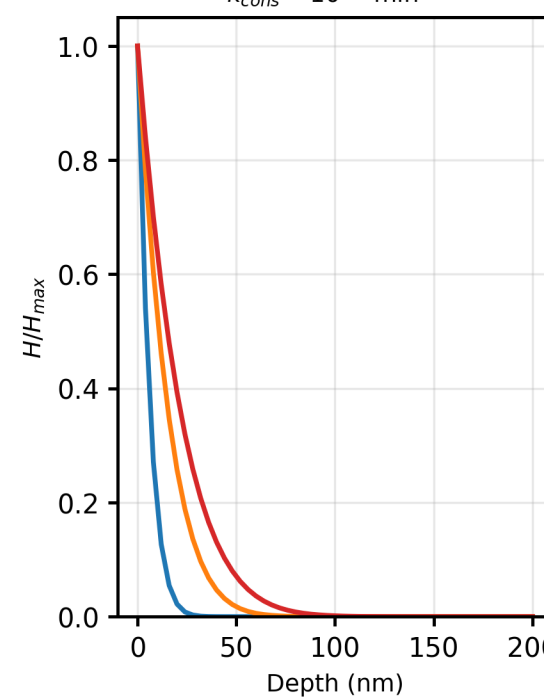

**E**  $D_{\text{eff}} = 10^{-16}$   $k_{\text{cons}} = 10^{-1} \text{min}^{-1}$

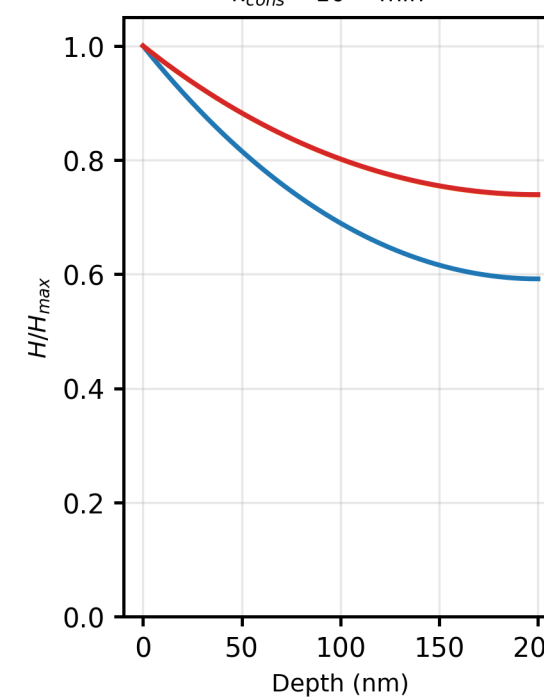

**F**  $D_{\text{eff}} = 10^{-16}$   $k_{\text{cons}} = 10^{-3} \text{min}^{-1}$

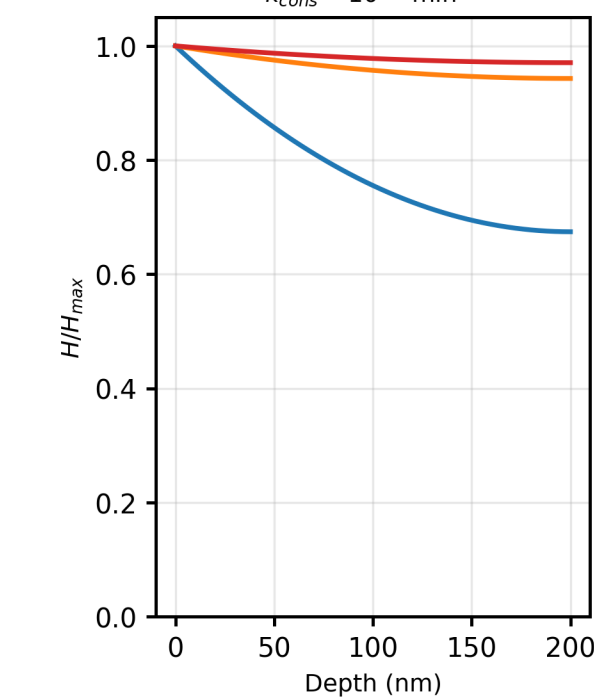

**G**  $D_{\text{eff}} = 10^{-19} \text{m}^2 \text{s}^{-1}$  (transport-limited)

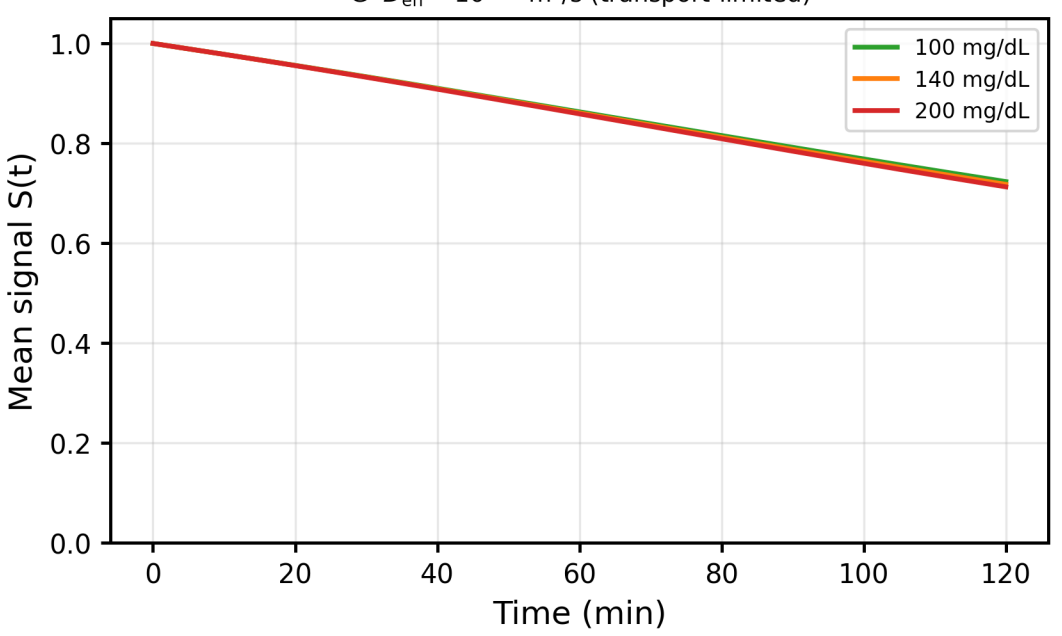

**H**  $D_{\text{eff}} = 10^{-16} \text{m}^2 \text{s}^{-1}$  (homogeneous limit)

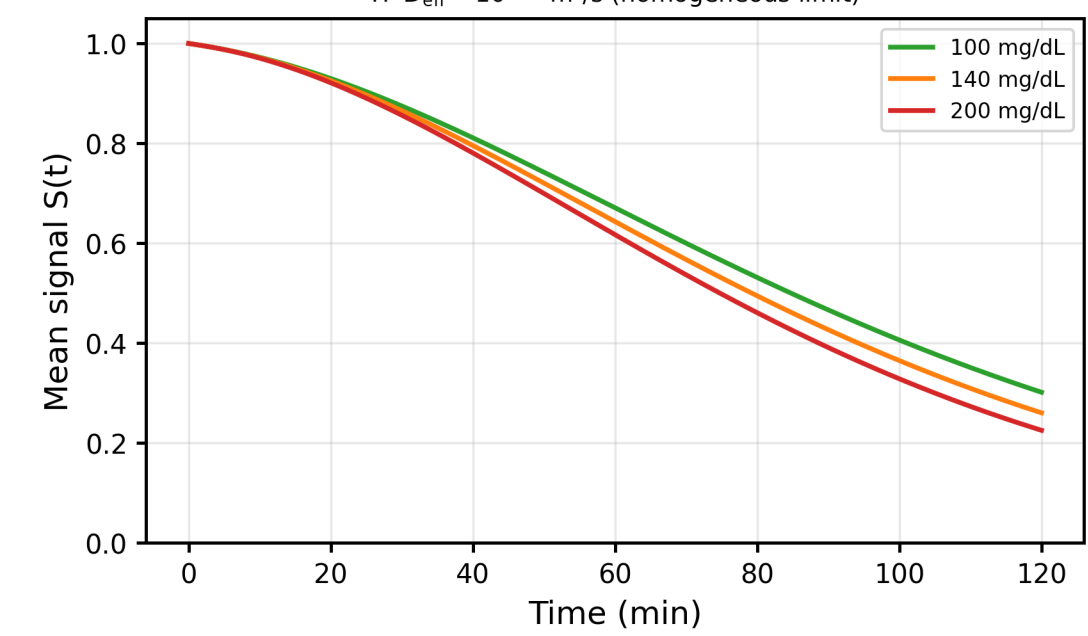

Supplement: d6ra01076h3.pdf [file d6ra01076h3.pdf]
