# Supplementary material for: Degradation-as-signal: a digital-twin framework for disposable optical glucose sensing with lead-free perovskite-inspired films
Source: Royal Society of Chemistry journal article supplement (doi:10.1039/d6ra01076h), 2026-04-22

A  $k_0$  perturbation (100 vs 200 mg/dL)

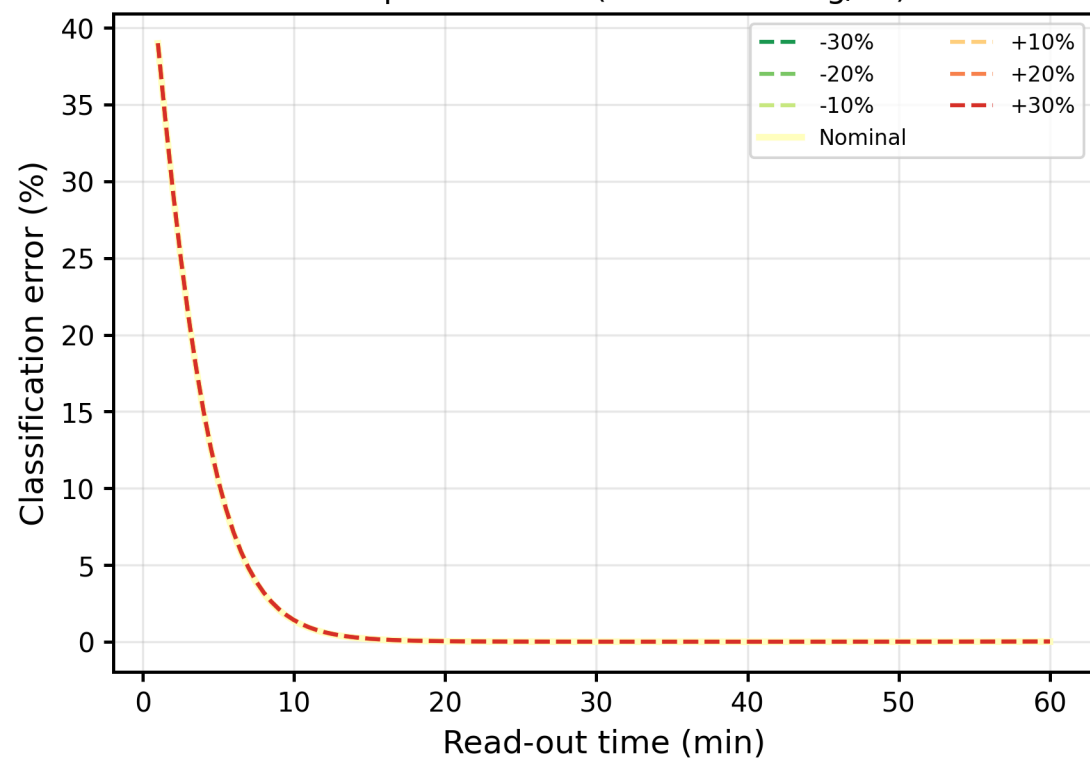

B  $k_G$  perturbation (100 vs 200 mg/dL)

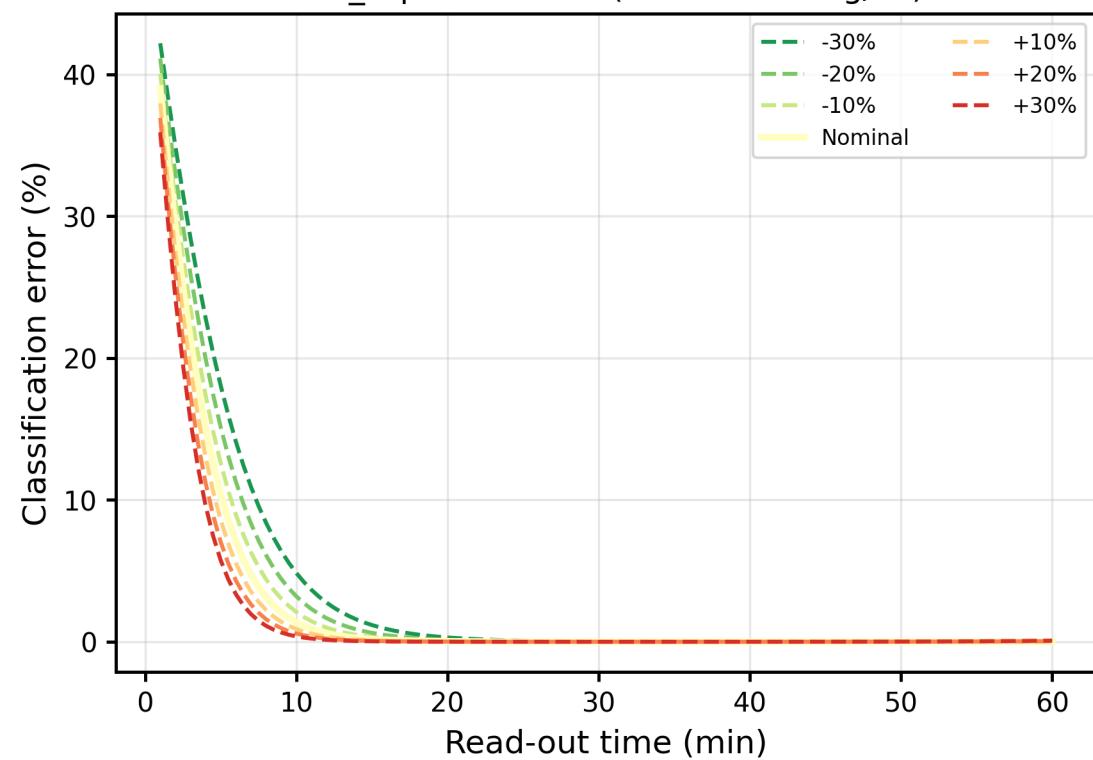

C Shift in optimal read-out time

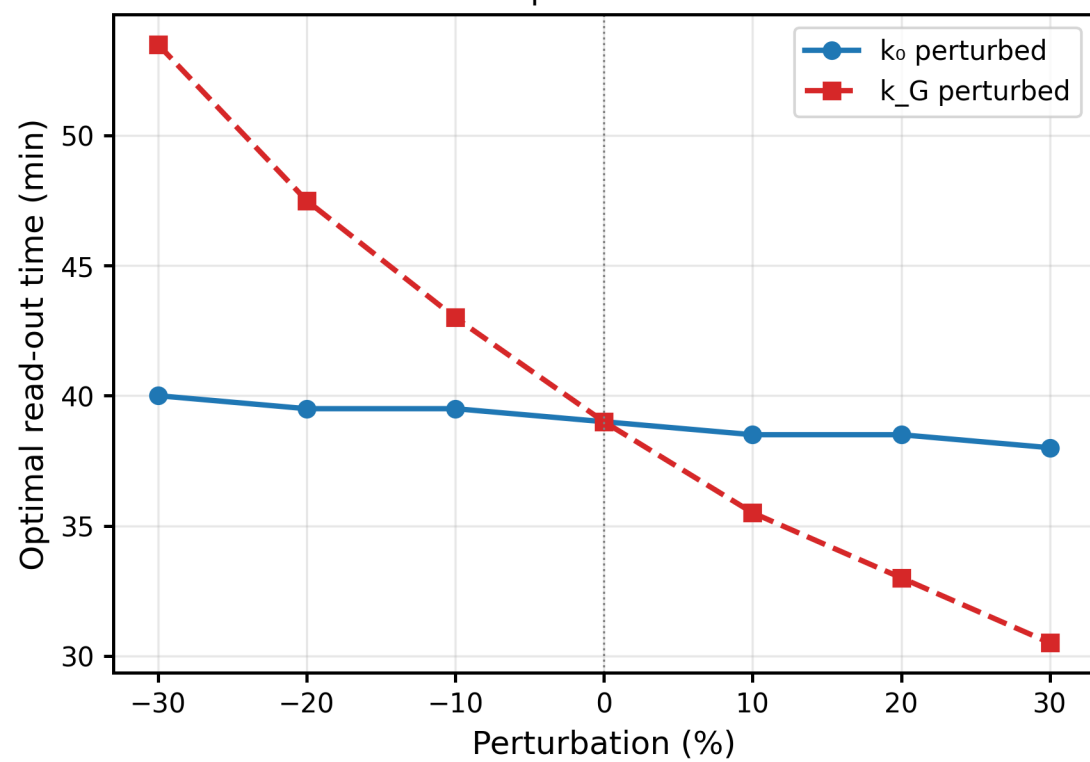

D Min error under kinetic uncertainty

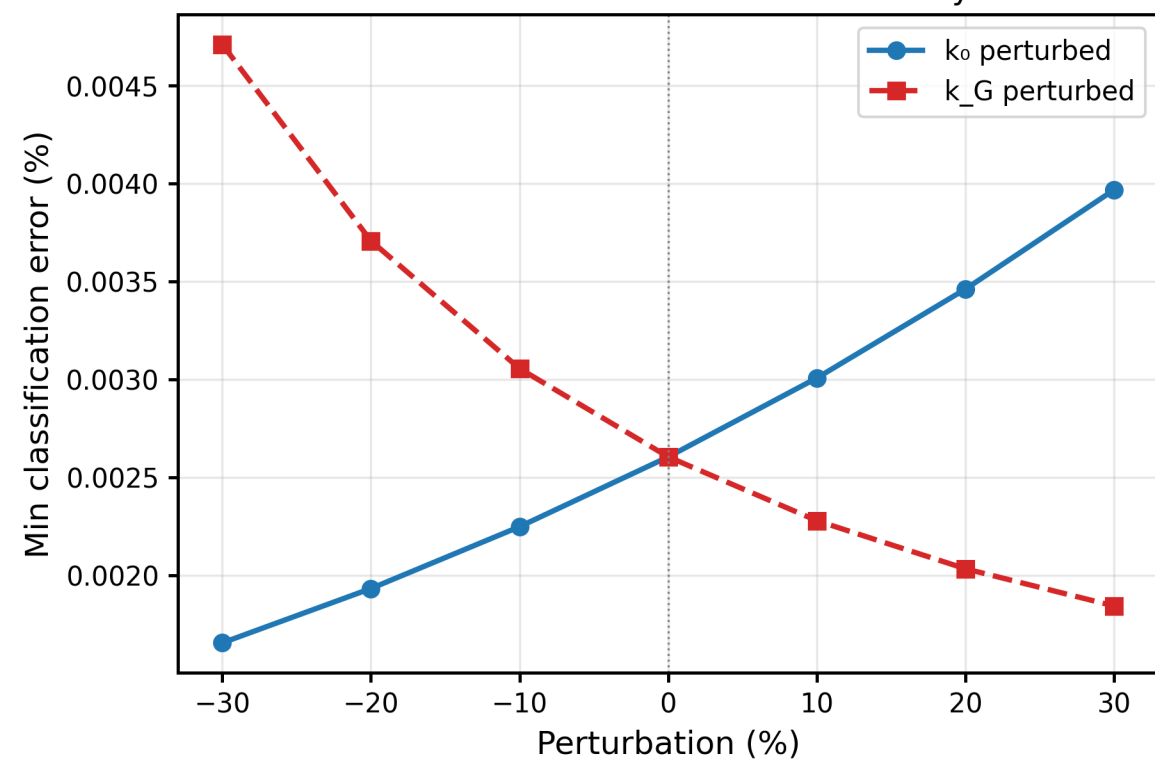

Supplement: d6ra01076h4.pdf [file d6ra01076h4.pdf]
