# Supplementary material for: Degradation-as-signal: a digital-twin framework for disposable optical glucose sensing with lead-free perovskite-inspired films
Source: Royal Society of Chemistry journal article supplement (doi:10.1039/d6ra01076h), 2026-04-22

**Figure S4 - Linearised vs full Michaelis-Menten GOx model**  
**Linearisation is a conservative upper bound:  $H_{lin} \geq H^{MM}$**

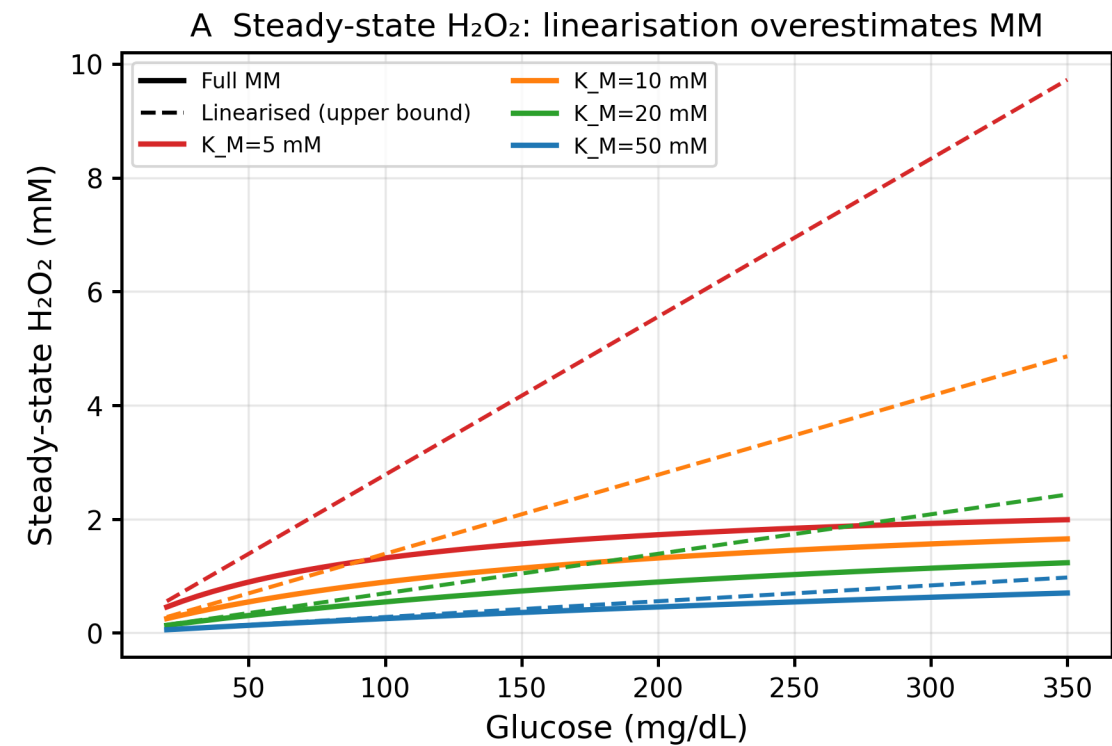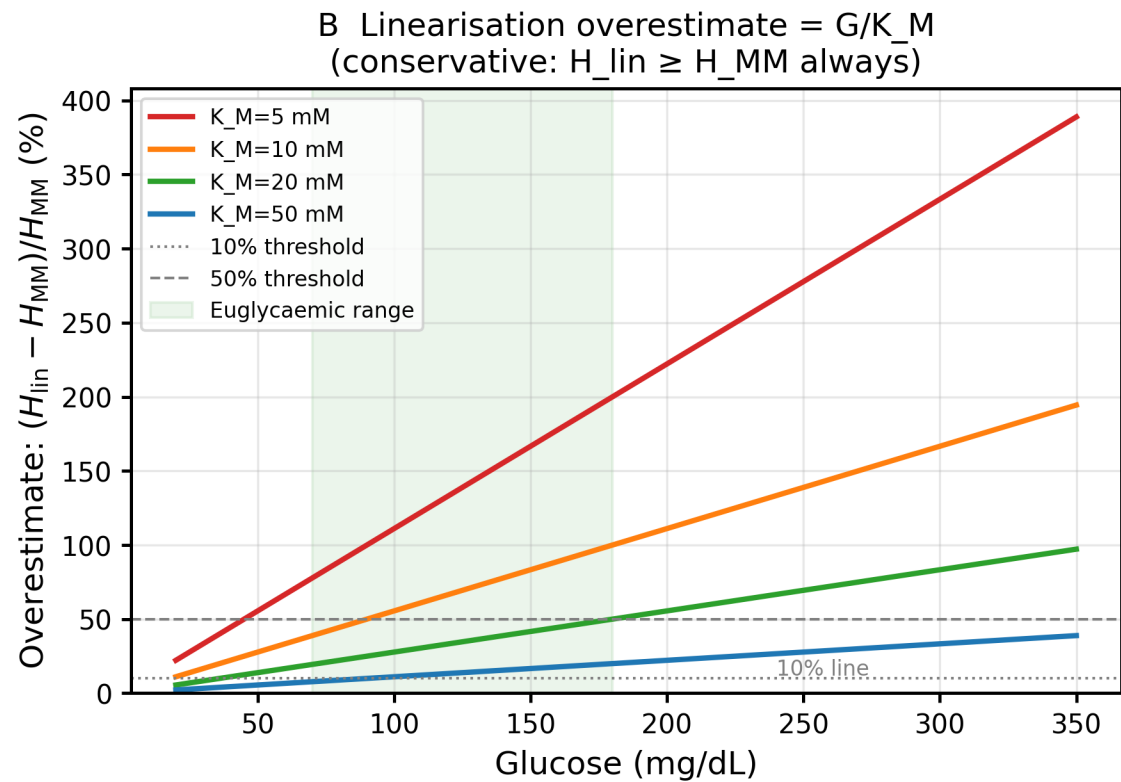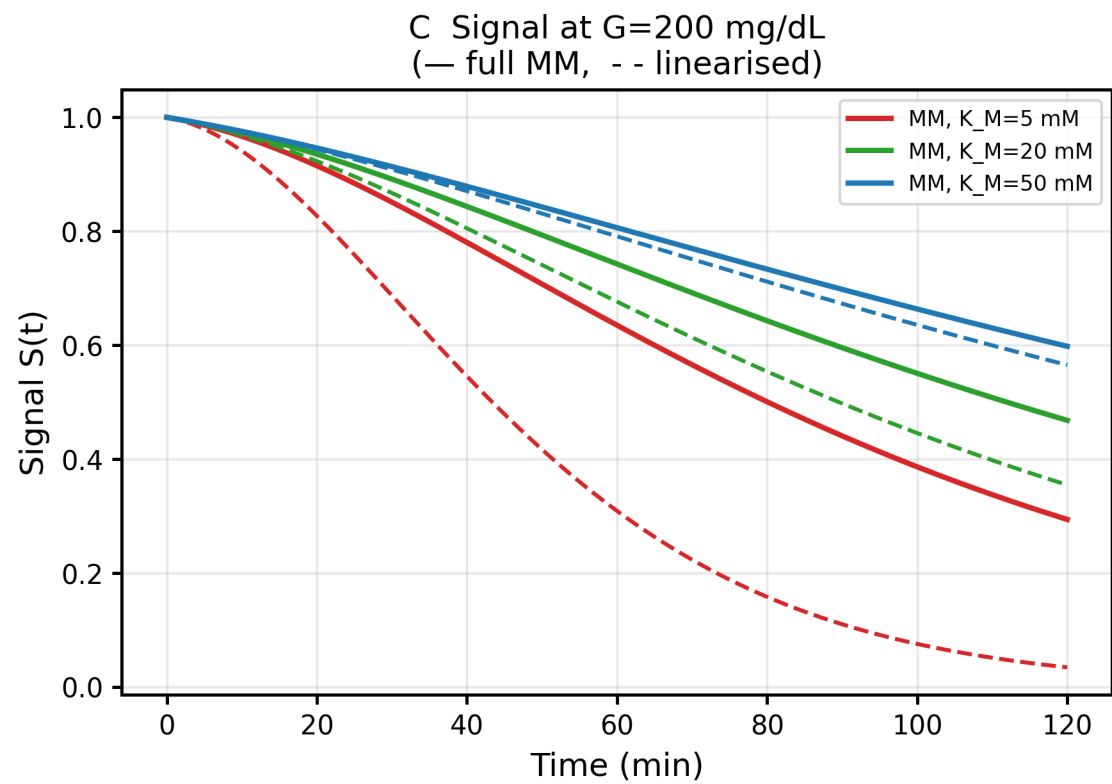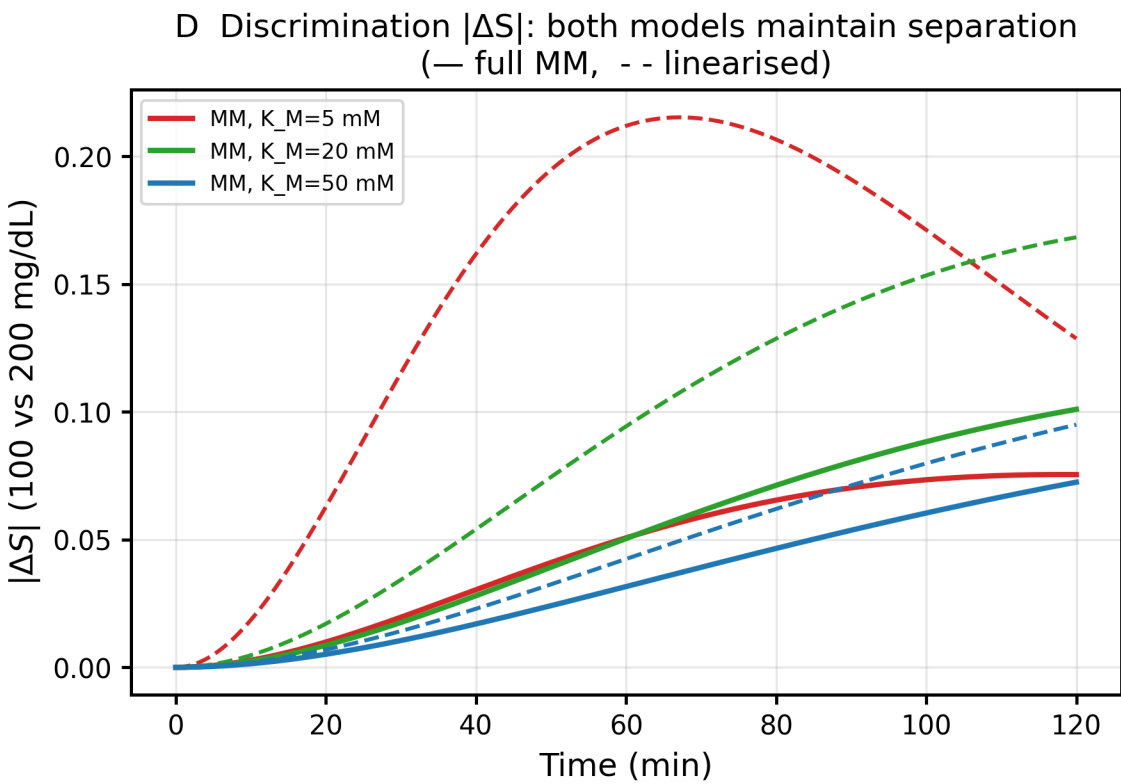

Supplement: d6ra01076h5.pdf [file d6ra01076h5.pdf]
