# Supplementary material for: Degradation-as-signal: a digital-twin framework for disposable optical glucose sensing with lead-free perovskite-inspired films
Source: Royal Society of Chemistry journal article supplement (doi:10.1039/d6ra01076h), 2026-04-22

**Figure S5 – Impact of Michaelis-Menten enzymatic saturation on discrimination performance (area-matched at  $G_{ref} = 200$  mg/dL;  $\sigma_S = 2\%$ ;  $t_{read} \leq 60$  min)**

— 100 vs 140 mg/dL    — 140 vs 200 mg/dL    — 100 vs 200 mg/dL    - - - Linear surrogate (ref.)    ····· Nominal  $K_M = 5$  mM

**A Discrimination error vs  $K_M$**

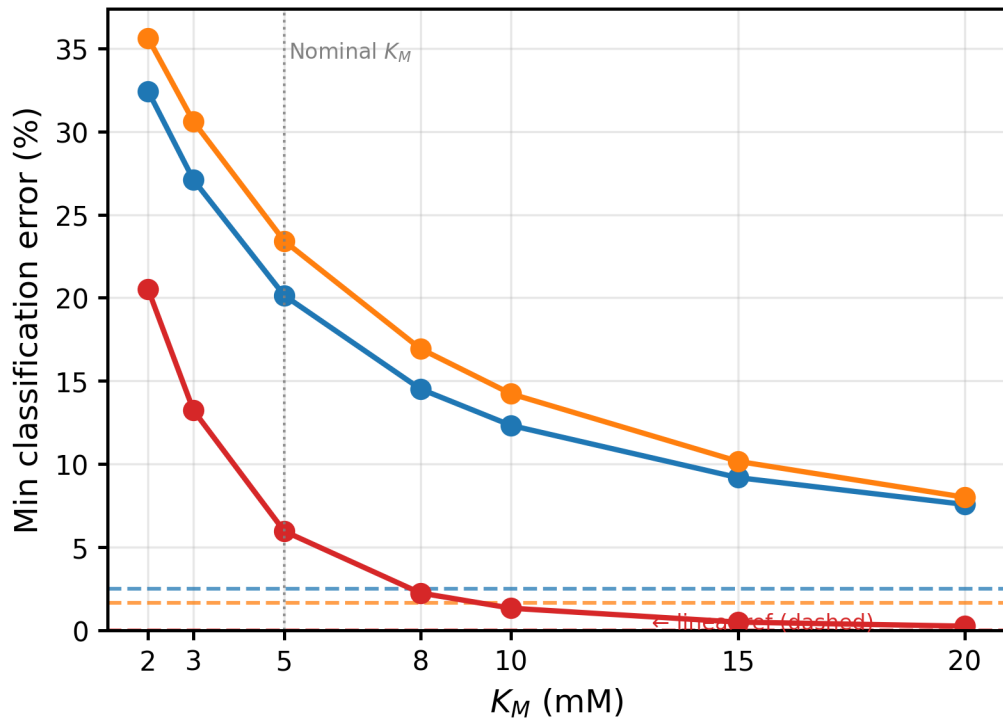

**B Optimal read-out time vs  $K_M$**

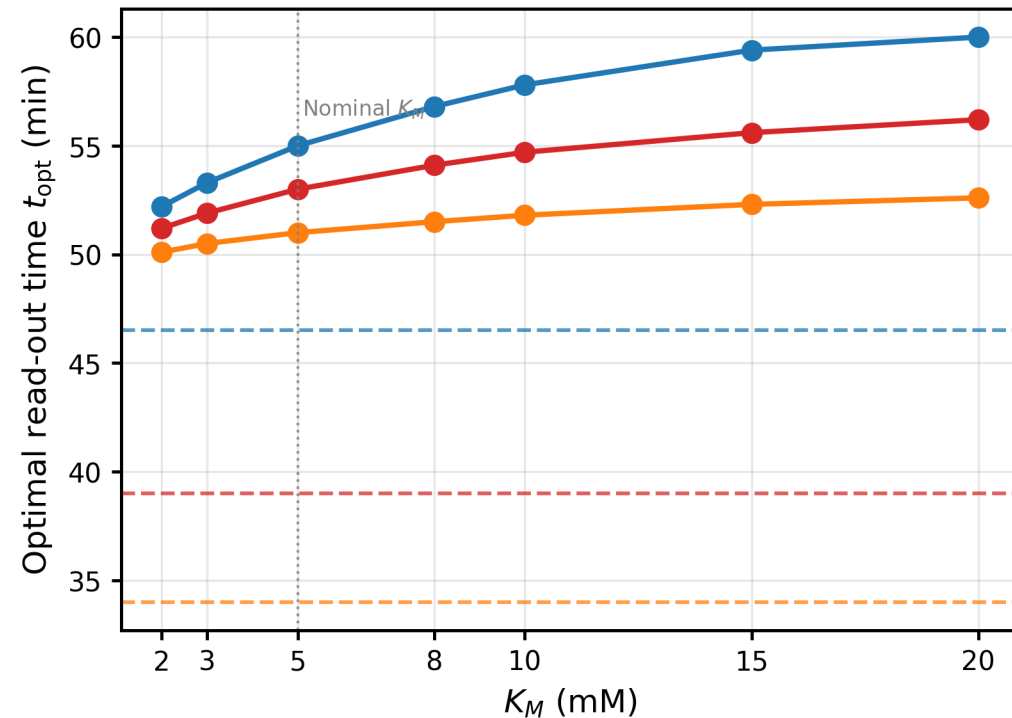

**C  $H_{ss}(G_2)/H_{ss}(G_1)$  vs  $K_M$**   
 (dashed = linear limit  $G_2/G_1$ ; saturation compresses contrast)

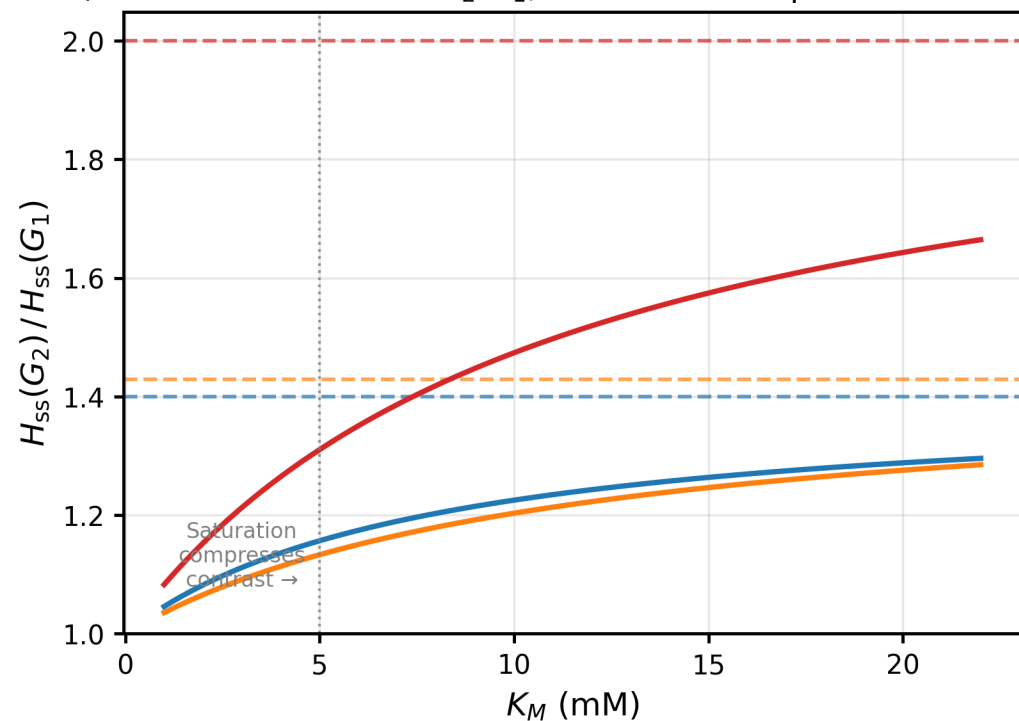

**D Signal traces for 100 vs 140 mg/dL**  
 at  $K_M = 5$  mM (nominal) and  $K_M = 2$  mM (saturated)

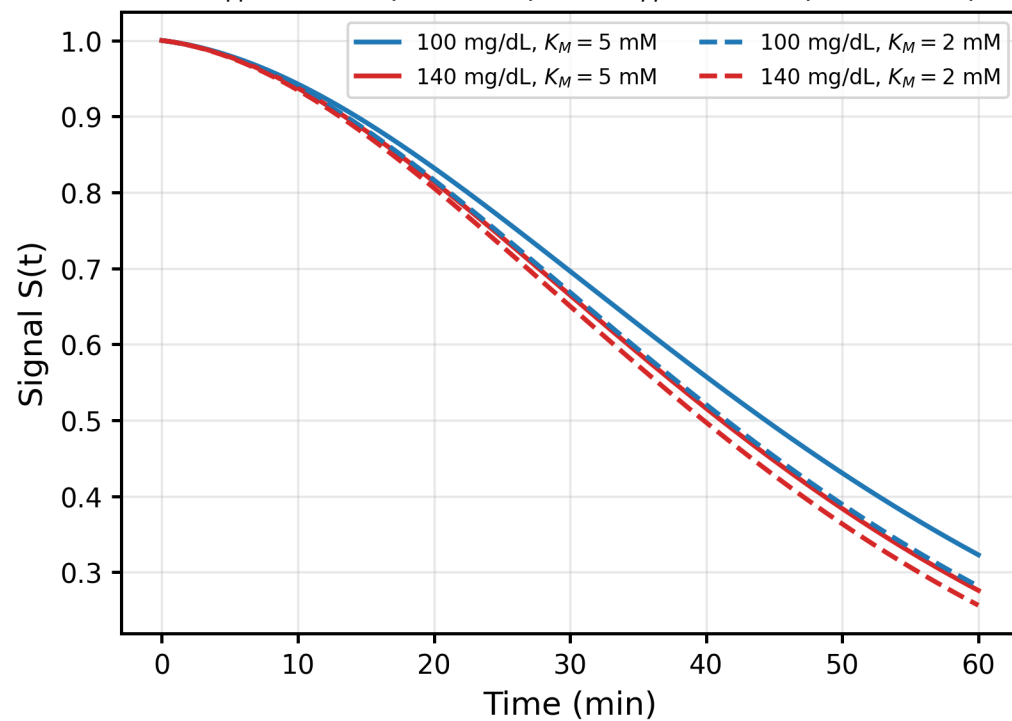

Supplement: d6ra01076h6.pdf [file d6ra01076h6.pdf]
